1 **Direct Repeats Co-occur with Few Short Dispersed Repeats in Plastid Genome of A**

2 **Spikemoss, *Selaginella vardei* (Selaginellaceae, Lycophyta)**

3 Hong-Rui Zhang<sup>1,2</sup>, Xian-Chun Zhang<sup>1</sup>, Qiao-Ping Xiang<sup>1\*</sup>

4 <sup>1</sup> State Key Laboratory of Systematic and Evolutionary Botany, Institute of Botany, the

5 Chinese Academy of Sciences, Beijing 100093, China.

6 <sup>2</sup> University of Chinese Academy of Sciences, Beijing 100049, China.

7

8 Email addresses: Hong-Rui Zhang: zhanghr@ibcas.ac.cn

9 Xian-Chun Zhang: zhangxc@ibas.ac.cn

10 Qiao-Ping Xiang: qpxiang@ibcas.ac.cn

11

12 \* Author for correspondence. E-mail: qpxiang@ibcas.ac.cn

13 **Abstract**

14 **Background:** It is hypothesized that the highly conserved inverted repeat (IR) structure  
15 of land plant plastid genomes (plastomes) is beneficial for stabilizing plastome  
16 organizations, whereas the mechanism of the occurrence and stability maintenance of  
17 the newly reported direct repeats (DR) structure was yet awaiting further exploration.  
18 Here we introduced the DR structure of plastome in *Selaginella vardei* (Selaginellaceae,  
19 Lycophyta), trying to elucidate the mechanism of DR occurrence and stability  
20 maintenance.

21 **Results:** The plastome of *S. vardei* is 121,254 bp in length and encodes 76 different  
22 genes, of which 62 encode proteins, 10 encode tRNAs and four encode rRNAs.  
23 Unexpectedly, the two identical rRNA gene regions (13,893 bp) are arranged into DR,  
24 and a ca. 50-kb *trnN-trnF* inversion spanning one DR copy exists in *S. vardei*, comparing  
25 to the typical IR organization of *Isoetes flaccida* (Isoetaceae, Lycophyta). We find  
26 extremely rare short dispersed repeats (SDRs) in plastome of *S. vardei* and is confirmed  
27 in its closely related species *S. indica*. The occurrence time of DR in Selaginellaceae is  
28 estimated at late Triassic (ca. 215 Ma) based on the phylogenetic framework of land  
29 plants.

30 **Conclusions:** We propose that the unconventional DR structure, co-occurred with  
31 extremely few SDRs, plays key role in maintaining the stability of plastome, and reflects  
32 a relic of the environmental upheaval during extinction event. We suggest that the ca.  
33 50-kb inversion resulted in the DR structure, and recombination between DR regions

34 is confirmed to generate multipartite subgenomes and diverse multimers, which shed  
35 lights on the diverse structures in plastome of land plants.

36 **Keywords:** direct rRNA repeat; inversion; *Selaginella*; short dispersed repeats;  
37 subgenome

38

## 39 **Background**

40 Chloroplasts play a crucial role in maintaining life on earth through the process of  
41 photosynthesis in plants [1]. Chloroplasts in land plants have genomes that are widely  
42 conserved due to the constantly high selective pressures of photosynthesis [2]. Most  
43 plastomes are characterized by a quadripartite structure, which comprises two copies  
44 of an inverted repeat (IR) separating the large (LSC) and small (SSC) single copy regions.  
45 The size of land plant plastomes usually ranges from 108 to 165 kb, and they generally  
46 contain 110-130 distinct genes including about 30 transfer RNA (tRNA) genes, four  
47 ribosomal RNA (rRNA) genes, and approximately 80 protein-coding genes involved in  
48 photosynthesis or other metabolic processes [3, 4]. The typical IR is usually 20 - 30 kb  
49 and the genes that form the core of the IR encode the ribosomal RNAs (23S, 16S, 5S  
50 and 4.5S) [5]. While plastomes of most land plants possess the typical IR structure,  
51 several lineages of land plants only retain one copy of the IR, such as in *Carnegieia*  
52 *gigantea* (Cactaceae) [6], *Erodium* (Geraniaceae) [7], and an IR-lacking clade of  
53 Fabaceae [8], as well as conifers [9], in which one IR has been either extremely  
54 shortened or completely lost.

55 The conserved IR structure across land plants was hypothesized to function as  
56 stabilizing the entire plastome against major sequence rearrangements [10]. JD Palmer  
57 and WF Thompson [11] showed that rearrangement events were extremely rare in  
58 genomes with an IR, but increased remarkably in frequency when one IR copy was  
59 absent. Their hypothesis is supported by some recent studies using next generation  
60 sequencing. For example, *Trifolium* [12] and *Erodium texanum* [13] lack one copy of

61 the IR and have highly rearranged plastomes. However, plastomes of *Pelargonium* [14]  
62 and *Trachelium* [15] are also highly rearranged, despite the presence of the IR  
63 structure, so that the existence of the IR appears to be not sufficient to stabilize the  
64 plastome structure [16]. A related hypothesis suggests that the incidence of short  
65 dispersed repeats (SDRs) is correlated with instability of plastomes. Extensive studies  
66 have shown that genomes with massive rearrangement events tend to contain a high  
67 frequency of SDRs (*Trifolium* [12]; *Trachelium* [15]; *Pelargonium* [14]), whereas  
68 genomes containing virtually no SDRs have the conserved organization (*Erodium* [13];  
69 algae [17, 18]).

70 Algal plastomes have shown extensive variation in size and structure compared to land  
71 plants [19-21]. Certain dinoflagellates contain several 2 to 3 kb minicircles mostly  
72 encoding only a single gene [22], whereas Cladophorales algae possess the fragmented  
73 linear ssDNA molecules folding into hairpin configurations [23]. The number and  
74 orientation of rRNA encoding repeats are also much more variable in algae than in land  
75 plants [24]. One to five copies of rRNA encoding repeat are tandemly arranged in  
76 *Euglena* (green algae) [25], whereas in *Porphyra purpurea* (red alga), the two copies of  
77 rRNA encoding region are arranged into a direct repeat (DR) [26]. The mechanism of  
78 creating and maintaining this diversity remains unknown.

79 Among early diverging land plant lineages, *Selaginella tamariscina* (Selaginellaceae),  
80 has been recently reported to possess plastome with DR structure based on assembly  
81 from PacBio data [27]. However, the potential mechanism for its origin and unusual  
82 organization was left unknown and not discussed. Here we confirmed plastomes with

83 DR structure in *Selaginella* subg. *Rupestrae*, (Selaginellaceae, *sensu* Weststrand and  
84 Korall (2016)). We discovered that the two copies of DR were probably caused by a ca.  
85 50-kb *trnF-trnN* inversion that containing one DR copy. We also found extremely rare  
86 short SDRs in plastomes with DR comparing to that with IR in lycophyte. Given the  
87 subgenomes generated by the recombination between DR regions, we predict that the  
88 DR structure, co-occurred with extremely few SDRs, plays an important role in  
89 maintaining the stability of plastome and survived over 400 million years' evolutionary  
90 history [28].

## 91 **Results**

### 92 **The Unconventional Structure of the *S. vardei* Plastome**

93 We sequenced the plastome of *S. vardei* (Fig. 1; MG272482) using Illumina HiSeq 2500  
94 sequencing and assembled reads using *de novo* assembly methods. We combined the  
95 assembled contigs in Geneious 9.1.4 (Biomatters, Inc., Auckland, New Zealand;  
96 <https://www.geneious.com>) to extend them into one unit-genome. Reads coverage of  
97 the *S. vardei* plastome sequence is shown in Additional file 1, Fig. S1c. We also  
98 performed the assembly of the contigs in Bandage 0.8.1 [29], which similarly resulted  
99 in a single unit, circular plastome (Additional file 1, Fig. S1d). The plastome of *S. indica*  
100 (MK156801) was also assembled into a complete unit genome with DR structure (data  
101 not shown). The plastome organization and gene content are basically consistent with  
102 *S. vardei*, therefore, we, here, only described the detailed plastome information of *S.*  
103 *vardei*.

104 The plastome of *S. vardei* was 121,254 bp in length and contained 76 different genes  
105 with 62 protein coding genes, four rRNA genes, and 10 tRNA genes (Additional file 6,  
106 Table S1). Thus, the plastome size of *S. vardei* was much smaller than that of the  
107 published plastomes of *S. uncinata* and *S. moellendorffii*, apparently owing to gene  
108 losses, such as, of all 11 *ndh* genes and two more tRNA genes (*trnQ* and *trnR*). The  
109 plastome of *S. vardei* was similar to most land plants in having a quadripartite structure,  
110 separated by two copies of large rRNA encoding repeat (13,893 bp). However, the two  
111 copies of repeat were arranged into DR, with two single copy regions of almost equal  
112 size (47,676 bp and 45,792 bp, respectively).

### 113 **Confirmation of the Plastome Structure of *S. vardei***

114 To verify the DR structure in *S. vardei* assembled with next generation data, we  
115 performed long PCR experiments across the whole plastome and obtained the  
116 sequences using Sanger sequencing methodology. The long PCR experiments resulted  
117 in 12 products of the expected length (ca. 7-11 kb) (Additional file 1, Fig. S1a) using 12  
118 pairs of primers (Additional file 7, Table S2) and newly designed internal primers  
119 (Additional file 8, Table S3). We mapped the long PCR products to the assembled  
120 plastome of *S. vardei* (Fig. 1). All the intergenic regions were covered by Sanger  
121 sequencing.

122 In addition, the PCR product of the twelve pairs of primers at the boundaries of DR  
123 region and the ca. 50-kb inversion also supported the plastome structure of *S. vardei*  
124 (Additional file 1, Fig. S1b). The amplified fragments were consistent with the DR

125 structure (1-2: *rps4-rrn5* and 3-4: *petN – rpl2*; 7-8: *ccsA-rrn5* and 9-10: *petN-rpoB*) and  
126 the ca. 50-kb inversion (1-2: *rps4-rrn5* and 5-6: *atpE-chlL*) in *S. vardei*. Accordingly, a  
127 negative control consistent with amplification of a typical IR structure (1-3: *rps4-petN*  
128 and 2-4: *rrn5-rpl2*; 7-9: *ccsA-petN* and 8-10: *rrn5-rpoB*) and without the ca. 50-kb  
129 inversion structure (1-5: *rps4-atpE* and 2-6: *rrn5-chlL*) yielded no PCR product. We  
130 further checked the sequences at boundaries of the DR region and the ca. 50-kb  
131 inversion. The assembled sequences from NGS were identical with sequences from  
132 Sanger sequencing. The congruent results from Sanger with next generation  
133 sequencing strongly support the DR structure and the ca. 50-kb inversion in the *S.*  
134 *vardei* plastome.

### 135 **PCR Confirmation of DR Structure in Representatives of subg. *Rupestrae***

136 We performed PCR experiments on one additional individual of *S. vardei* and two other  
137 species representing *Selaginilla* subg. *Rupestrae* (Table 1, additional file 9, Table S4)  
138 and these yielded the expected products with consistent length (Additional file 2, Fig.  
139 S2a). PCR products were consistent with DR structure (1-2: *rps4-rrn5* and 3-4: *petN-*  
140 *rpl2*; 7-8: *ccsA-rrn5* and 9-10: *petN-rpoB*) and the ca. 50-kb inversion (1-2: *rps4-rrn5*  
141 and 5-6: *atpE-chlL*). The alignment sequences of the four representatives showed  
142 several insertion/deletions (Additional file 2, Fig. S2b). Sequence divergence is  
143 remarkable between *S. dregei* and the other two species. For example, a 475 bp  
144 deletion existed at the region of *ccsA-rrn5* in the plastome of *S. dregei*, (collected from  
145 Kenya, Africa), which also exhibits a smaller sized PCR product than the other species  
146 (Additional file 2, Fig. S2b: 26698, 7-8).



147 **Gene Order of Plastomes in *S. vardei* and Other Lycophytes**

148 Dot plot analysis (Additional file 3, Fig. S3) showed that the gene order of the plastome  
149 of the *S. vardei* was considerably divergent from other species of lycophytes.

150 Plastomes of *Huperzia serrata* and *Isoetes flaccida* were basically syntenic  
151 representing the ancestral organization for lycophytes (Additional file 3, Fig. S3a).

152 However, plastomes of *S. vardei* were quite divergent when comparing with its sister  
153 group *I. flaccida* (Additional file 3, Fig. S3b). A large inversion was present in *S. vardei*

154 that encompasses a ca. 50-kb region from *trnN* to *trnF*, its endpoints lying between  
155 *rps4* and *trnN* at one end and between *trnF* and *chlL* at the other (Figs. 1 and 2). In *I.*

156 *flaccida*, two tRNA genes, *trnL-UAA* and *trnT-UGU* were situated between *rps4* and  
157 *trnF* in LSC region, whereas *trnN* was at the border of the IRb/SSC adjacent to *ycf2*. In

158 *S. vardei*, however, *trnL-UAA* and *trnT-UGU* were absent, *trnF* was located in the SSC,  
159 and *trnN* was located at the border of DRb/LSC next to *rps4*. Thus, we infer that the DR

160 in *S. vardei* was caused by this ca. 50-kb inversion owing to one copy of the DR (*trnN*-  
161 *trnC*) located inside the inversion. In addition, *S. vardei* has an expanded DR that has

162 duplicated *psbM* through *trnC* from the LSC, and *rpoB* was located at the start position  
163 of LSC region. Gene *ycf2* relocated to LSC, and *chlL/chlN* relocated to be adjacent to

164 *ycf1*, which was consistent with the plastome of *H. serrata*.

165 One remarkable difference between the plastomes of *S. uncinata* and *S. moellendorffii*  
166 was that *S. moellendorffii* lacked a ca. 20-kb inversion (from *trnC* to *psbI*) existing in *S.*

167 *uncinata* (Fig. 2). This inversion was also absent from the plastome of *S. vardei*, which

168 suggests that the absence of this *trnC-psbI* inversion might be the ancestral state in  
169 Selaginellaceae. The previously published plastomes of *S. uncinata* [30] and *S.*  
170 *moellendorffii* [31] possess the typical IR structure, which was universal in other land  
171 plants [2]. Comparing the plastomes among *S. vardei* and the two published  
172 *Selaginella* species, our dot plot results showed that an inversion of the ca. 60-kb *psbD-*  
173 *trnM/ndhJ* (lost in *S. vardei*) fragment existed between the plastomes of *S. vardei* and  
174 *S. moellendorffii* (Additional file 3, Fig. S3c), whereas a ca. 65-kb inversion of *trnD-trnF*  
175 existed in plastomes between *S. vardei* and *S. uncinata* (Additional file 3, Fig. S3d).

#### 176 **Short Dispersed Repeats (SDRs) in Plastomes of *S. vardei* and Other Species**

177 Repeats analyses showed that SDRs in the Selaginellaceae plastomes with DR ((Fig. 3e,  
178 f) were obviously fewer than those with IR in other lycophytes (Fig. 3a-d and Additional  
179 file 10, Table S5). *Huperzia serrata* had the most SDRs with thirty-one whereas *S. vardei*  
180 and *S. indica* contained the fewest with only six and five, respectively. Furthermore,  
181 no SDRs were found at the endpoints of the inversion and the DR regions in the  
182 plastome of *S. vardei* and *S. indica*, and the length of all the SDRs in them was less than  
183 50 bp. In *S. uncinata*, a pair of short repeats (46 bp) was located between the *psbI* and  
184 the *trnC-psbK* intergenic region, flanking the ca. 20-kb inversion from *psbI-trnC* (Fig. 3c  
185 and Additional file 3, Fig. S3d). Another pair of 98 bp short repeats located between  
186 *petA-psbJ/rpl20-psbB* in plastome of *S. uncinata* could also potentially cause inversions  
187 (Additional file 10, Table S5-3).

#### 188 **The Evolution and Divergence Time of DR in Plastomes of Land Plants**

189 Phylogenetic relationships based on 32 protein-coding genes of plastomes (Fig. 4)  
190 showed that subg. *Rupestrae* containing *S. vardei* and *S. indica* was early diverging  
191 compared to *S. tamariscina*, which was sister to the clade containing *S. moellendorffii*  
192 and *S. uncinata* in Selaginellaceae (Fig. 4). The split between Selaginellaceae and its  
193 sister family Isoetaceae was ca. 381 million years ago (Ma) [32]. We inferred the  
194 divergence time of subg. *Rupestrae* was at late Triassic (ca. 215 Ma) (Fig. 4). When we  
195 mapped the simplified structure of plastomes to the phylogenetic tree, it is clear that  
196 most plastomes of land plants possessed the typical IR structure. In plastome of ferns,  
197 the rRNA genes were arranged in reverse order in Schizaeales and core  
198 leptosporangiates in comparison to the basal ferns [33], however, still maintained the  
199 IR structure. Thus, DR structure only occurred in the early diverging subg. *Rupestrae*  
200 (Fig. 4 **a, b**) and *S. tamariscina*. (Fig. 4 **c**).

## 201 **Discussion**

### 202 **The Characterization of the DR Structure in the Plastomes of Selaginellaceae**

203 It is well known that plastome organization is highly conserved within land plants with  
204 the IR being the most conservative feature of land plant plastomes [3]. However, with  
205 the studies on plastomes going deeper, loss of one copy of the IR was uncovered to  
206 occur in several lineages of seed plants [6-8], and the DR structure has been reported  
207 in the recently published plastome of *S. tamariscina* with the mechanism of DR  
208 structure occurrence and maintenance left unknown [27]. Here we documented that  
209 the plastome of the *Selaginella* species *S. vardei* and *S. indica* possesses two copies of

210 DR, rather than IR. The two copies of DR are identical and separate the single copy  
211 regions into almost equal size (Fig. 1). Furthermore, the DR structure of *S. vardei* was  
212 confirmed by PCR amplification in a different individual of *S. vardei* (collected from  
213 Tibet, China) and two other representative species (two individuals of *S. indica* from  
214 China and one individual of *S. dregei* from Kenya) (Table 1, Additional file 2, Fig. S2a),  
215 suggesting that the DR structure is a shared characteristic in subg. *Rupestrae*.  
216 *Selaginellaa* subg. *Rupestrae* containing *S. vardei* and *S. indica* is an early diverging  
217 clade, which is sister to *S. tamariscina* and the clade containing *S. moellendorffii* and  
218 *S. uncinata* (Fig. 4). Therefore, more representative samples of other subgenera are  
219 needed to elucidate whether plastomes with DR in subg. *Rupestrae* and *S. tamariscina*  
220 a synapomorphy or autapomorphy.

221 The DR structure, first reported in a red alga *P. purpurea* [26], originated independently  
222 in Selaginellaceae from red algae, since they are quite distantly related. Considering  
223 the ancestral plastome in lycophytes has the typical IR as shown in plastomes of the  
224 sister families, Lycopodiaceae [34-36] and Isoetaceae [37], we propose that the  
225 innovative DR structure of plastomes in subg. *Rupestrae* and *S. tamariscina* [27]  
226 originated within the family Selaginellaceae. Comparing with the plastome structure  
227 of *I. flaccida*, a species from its sister family Isoetaceae, we detect a notable inversion  
228 of a ca. 50-kb from *trnN-trnF* in *S. vardei*. The ca. 50-kb inversion starts from the LSC  
229 and terminates at the border of DRb/SSC, spanning one DR copy, thus, results in the  
230 orientation change from inverted to direct. According to our divergence time  
231 estimation, the DR structure of subg. *Rupestrae* occurred at late Triassic (ca. 215 Ma)

232 with the 95% confidence interval as 142.5-281.6 Ma (Fig. 4). The previous studies  
233 inferred the divergence time of subg. *Rupestrae* around 200 Ma [32, 38], which lent  
234 support to our current results. The well-known Permian-Triassic (P-T) extinction event,  
235 occurred about 252 Ma ago [39] falls into the confidence interval of DR occurrence,  
236 therefore, the DR structure in Selaginellaceae possibly reflects a relic of the  
237 environmental upheaval during the extinction event related to increased anoxia,  
238 aridity, and UV-B radiation [39].

### 239 **Conformation of the Plastome with DR Structure of Selaginellaceae**

240 Although mapped as circular molecules, which are in a quite low proportion, the  
241 plastomes of land plants displayed a great structural diversity with a mixture of  
242 monomers and head-tail concatemers of circular and linear molecules together with  
243 highly complex branched structures [40, 41]. The presence of two equimolar isomers  
244 (direction change of single copy regions), which was hypothesized to occur through  
245 flip-flop recombination of the two IR regions in a circular plastome [10, 42], has been  
246 recently proved to be the results of recombination-dependent replication (RDR)  
247 among linear plastome templates [43, 44]. However, the existence of direct repeats  
248 could promote multipartite chromosomal architecture as proposed in mitogenomes  
249 [45]. Repeats larger than 1 kb are typically at or close to the recombinational  
250 equilibrium as shown in the mitogenome of *Ginkgo biloba* L., the recombinant forms  
251 of two 5.3 and 4.1 kb repeats existing at roughly similar stoichiometries [46]. In  
252 plastome of *Monsonia* (Geraniaceae), the direct repeats (2-3 kb) were confirmed to  
253 produce alternative structures based on the RDR mechanism [44]. Thus, progresses in

254 understanding the structure of both mitogenomes and plastomes suggest the  
255 existence of multipartite subgenomes for plastomes with DR in Selaginellaceae. The  
256 ca. 13 kb DR region in *S. vardei* could promote the generation of subgenomic  
257 chromosomes through recombination between two DR regions within one plastome  
258 or between different molecules following the RDR mechanism, with most or all of  
259 these molecules potentially occurring at similar stoichiometries. Two alternative read  
260 assemblies mapped at both ends of two copies of DR regions reflect the existence of  
261 subgenomes in plastome of *S. vardei* (Additional file 4, Fig. S4). Furthermore, we  
262 screened the PacBio reads of *S. tamariscina* plastome from Genbank and selected  
263 seven reads spanning the whole DR with both ends adjacent to genes from LSC, and  
264 two reads spanning DR with both ends adjacent to genes of SSC (Additional file 5, Fig.  
265 S5) confirming the recombination between DR regions and the existence of  
266 subgenomes in plastomes with DR structure. Either the master chromosome or  
267 subgenomic chromosomes could form head to tail multimers or branched complex  
268 based on the RDR mechanism (Additional file 4, Fig. S4e).

### 269 **The Co-occurrence of DR and Extremely Few SDR in the Plastome of Selaginellaceae**

270 Remarkably, SDRs in plastomes with DR are extremely depauperate, as is shown in *S.*  
271 *indica* and *S. vardei* (Fig. 3e, f). There is no SDRs located at the ends of this ca. 50-kb  
272 inversion and the size of all the SDRs in *S. vardei* (six) and *S. indica* (five) is 16-25 bp,  
273 which only possibly invoke microhomology-mediated recombination. Repeats  
274 mediating homologous recombination in plastomes and mitogenomes appears to be  
275 limited to large repeats (>100-200 bp) [43]. Plastomes with DR could generate

276 subgenomes at roughly similar stoichiometries by the recombination of DR regions.  
277 Therefore, the co-occurrence of DR and extremely few SDRs suggest that plastomes  
278 with DR are possible susceptible to SDRs scattered in single copy regions, which could  
279 generate secondary recombination within and among subgenomes [46, 47]. This  
280 secondary recombination caused by direct or inverted short repeats possibly results in  
281 plastome fragmentation or gene loss, which may influence the survival of plants.  
282 Therefore, we hypothesis that the co-occurrence of DR, together with virtually no  
283 other recombinational SDRs, maintains the integrity and stability of plastome, and  
284 survives long evolutionary history with over 400 million years.

## 285 **Conclusions**

286 We documented the unconventional DR structure in plastome of *S. vardei* and two  
287 other representative species in subg. *Rupestrae sensu* Weststrand and Korall (2016).  
288 The DR structure occurred within the Selaginellaceae group and most likely arose at  
289 late Triassic (ca. 215 Ma). We propose that the ca. 50-kb inversion resulted in the DR  
290 structure, which could generate multipartite subgenomes induced by the  
291 recombination between DR regions. Subsequently, the co-occurrence of DR and few  
292 SDRs plays key role in maintaining the integrity and stability of the unconventional  
293 plastomes, and survives long evolutionary history with over 400 million years.

294

295 **Methods**

296 **Taxon Sampling, DNA Extraction, Sequencing and Assembly**

297 *Selaginella vardei* is a member of the monophyletic subgenus, subg. *Rupestrae sensu*  
298 Weststrand and Korall (2016), characterized by having monomorphic and helically  
299 arranged vegetative leaves and tetrastichous strobili. We collected a sample of *S.*  
300 *vardei* (Zhang 6948, PE) from the wile in Sichuan Province, China for this study and  
301 deposited a voucher of the collection in the Herbarium of Institute of Botany, CAS (PE).  
302 One closely related species, *S. indica*, was also collected from Yunnan Province and  
303 deposited in PE. **One of the authors, Prof. Xian-Chun Zhang, a proficient taxonomist**  
304 **on ferns and lycophytes, identified the samples. Both species are not endangered**  
305 **according the Convention on International Trade in Endangered Species of Wild**  
306 **Fauna and Flora (CITES) (<https://www.cites.org/>).**

307 Total genomic DNA was isolated from silica gel-dried materials with a modified cetyl-  
308 trimethylammonium bromide (CTAB) method [48]. Library construction was  
309 performed with the NEBNext DNA Library Prep Kit (New England Biolabs, Ipswich,  
310 Massachusetts, USA) and sequencing was performed on the Illumina HiSeq 2500  
311 (Illumina, San Diego, California, USA). Illumina paired-end reads were mapped to *S.*  
312 *uncinata* (AB197035) [30] and *S. moellendorffii* (FJ755183) [31], with medium-low  
313 sensitivity in five to ten iterations in Geneious 9.1.4 (Biomatters, Inc., Auckland, New  
314 Zealand; <https://www.geneious.com>). The mapped reads were then assembled into  
315 contigs in Geneious. Additionally, the cleaned reads were assembled *de novo* with



316 SPAdes v. 3.10.1 [49] using a range of kmer sizes from 21 to 99. Putative plastome  
317 contigs were identified using BLASTN 2.2.29 [50], with the previously published *S.*  
318 *uncinata* and *S. moellendorffii* plastomes as reference. We also used bandage v. 0.8.1  
319 [29], a program for visualizing *de novo* assembly graphs, to help select plastome  
320 contigs and analyze *de novo* assembly results by importing the fastg file created by  
321 SPAdes. The contigs obtained from above ways were then combined and imported into  
322 Geneious to extend and assemble into the complete plastomes.

### 323 **Gene Annotation**

324 Gene annotations were performed using local BLAST with default parameter settings  
325 [51]. Putative start and stop codons were defined based on similarity with known  
326 sequences. The tRNAs were further verified using tRNAscan-SE version 1.21 [52] and  
327 ARAGORN [53]. Circular and linear genome maps were drawn with OGDRAW version  
328 1.2 [54].

### 329 **PCR Confirmation of *S. vardei* Plastome**

330 To confirm the accuracy of plastome assembly of *S. vardei*, we designed 12 pairs of  
331 primers (Additional file 7, Table S2) using Primer v 3.0 [55] based on the assembled  
332 sequence order of *S. vardei* to do long range PCR trying to amplify and sequence the  
333 whole plastome, and then, compare with the assembled one. Furthermore, we  
334 designed twelve pairs of primers (Additional file 9, Table S4) at the boundaries of the  
335 DR structure and the ca. 50-kb inversion in plastome of *S. vardei* (marked on Fig. 1) to  
336 confirm the accuracy of assembly. The PCR amplifications were performed in a total

337 volume of 20  $\mu$ L containing 4  $\mu$ L of 5X PrimeSTAR GXL Buffer, 1.6  $\mu$ L of dNTP Mixture  
338 (2.5 mM each), 1.2 $\mu$ L of each primer (5 mM), 0.4  $\mu$ L of PrimeSTAR GXL DNA Polymerase  
339 and 20 ng of template DNA. Cycling conditions were 98  $^{\circ}$ C for 3 min, followed by 40  
340 cycles of 98  $^{\circ}$ C for 10 s, 58  $^{\circ}$ C for 30 s and 72  $^{\circ}$ C for 5 min for long range PCR and  
341 1.5 min for normal PCR, and a final extension of 72  $^{\circ}$ C for 10 min. The PCR products  
342 were verified by electrophoresis in 0.8% agarose gels stained with ethidium bromide.  
343 Then, we designed the internal primers (Additional file 8, Table S3) to get sequences  
344 of these PCR products using Sanger sequencing. The PCR products of the DR and  
345 inversion confirmation were also sequenced by the company Majorbio, Beijing, China.

#### 346 **PCR Confirmation of DR Structure in Related Representatives of subg. *Rupestrae***

347 To further test whether the structure found in *S. vardei* existed in other species of subg.  
348 *Rupestrae*, PCR amplification using primers designed at the boundaries of the DR  
349 structure and the ca. 50-kb inversion in plastome of *S. vardei* (marked on Fig. 1,  
350 additional file 9, Table S4) were carried out with another individual of *S. vardei*, two  
351 individuals of *S. indica*, and one individual of *S. dregei* (Table 1). Only positive control  
352 was carried out in these species. The PCR procedure follows the conditions of normal  
353 PCR mentioned above. The PCR products were verified by electrophoresis in 0.8%  
354 agarose gels stained with ethidium bromide. The PCR products were sequenced by the  
355 company Majorbio, Beijing, China.

#### 356 **Comparison of the Plastomes of *S. vardei* and Other Lycophytes**

357 Dot plot analyses of the plastid genome of *S. vardei* and other lycophytes (*S. uncinata*

358 AB197035, *S. moellendorffii* FJ755183, *I. flaccida* NC\_014675 and *H. serrata*  
359 NC\_033874) were performed using the Gepard Software [56] in order to identify the  
360 putative structural rearrangements in *S. vardei* plastome. The syntenic analyses of  
361 linear maps for plastomes of *S. vardei* and other lycophytes were then carried out  
362 based on the dot plot analyses. The first site of LSC at the border of LSC/IRa was  
363 considered as the starting point.

### 364 **Repeat Analyses**

365 Short dispersed repeats (SDRs) were identified using RepeatsFinder [57] with default  
366 parameters. The circular layouts of SDRs in plastome were then visualized using the  
367 *circlize* package [58] in R. The accurate locations of some SDRs were marked in order  
368 to find some possible correlations with rearrangements. Six plastomes (*H. serrata*  
369 NC\_033874, *I. flaccida* NC\_014675, *S. uncinata* AB197035, *S. moellendorffii* FJ755183,  
370 *S. indica* and *S. vardei*) were included. One copy of the IR/DR was removed from all  
371 plastomes used.

### 372 **Phylogenetic Analyses and Divergence Time Estimation of DR Structure**

373 Thirty-two conservative protein-coding genes of plastomes were performed to  
374 reconstruct the phylogenetic framework using 19 species from previously published  
375 plastomes of land plants (from moss to seed plants) (Additional file 11, Table S6). We  
376 downloaded the raw reads of *S. tamariscina* from Genbank (SRR6228814,  
377 SRR7135413), assembled plastid contigs and extracted the 32 gene sequences to  
378 perform the phylogenetic analysis since the complete plastome of it has not been

379 released on the Genbank. A total of 19,248 bp sequences were aligned using MAFFT  
380 [59] under the automatic model selection option with some manual adjustments.  
381 Maximum-likelihood (ML) analysis was performed using RAxML v. 7.4.2 with 1000  
382 bootstrap replicates and the GTR+G model [60] based on Akaike information criterion  
383 (AIC) in jModeltest 2.1.7 [61]. The simplified structure of the plastome of each species  
384 was then mapped on the phylogenetic tree showing the direction of rRNA encoding  
385 repeat.

386 Estimations of lineage divergence times were undertaken in BEAST version 1.8.2 [62]  
387 with three fossil calibration nodes were employed. A secondary calibration of the root  
388 age corresponded to the split of Bryophytes and vascular plants (Fig. 4, node A: [470-  
389 583 Ma]) [63] with a selection of normal prior distributions. We employed two fossils  
390 for the second (separating Selaginellaceae and its sister family Isoetaceae (372-392 Ma)  
391 [32]) and third (separating ferns and seed plants (385-451 Ma) [63] nodes with a  
392 lognormal prior distribution. A relaxed clock with lognormal distribution of  
393 uncorrelated rate variation was specified. A birth-death speciation process with a  
394 random starting tree was adopted. The MCMC chain was run for 400,000,000  
395 generations, sampling every 1000 generations. The effective sample size (ESS) was  
396 checked in Tracer v 1.5 [64]. The maximum clade credibility tree was generated using  
397 TreeAnnotator in BEAST and the tree was plotted using FigTree 1.4.3 [65].

398 **Abbreviations:**

399 CITES, Convention on the Trade in Endangered Species of Wild Fauna and Flora;  
400 CTAB, Cetyl-trimethylammonium bromide; DR, Direct repeat; IR, Inverted repeat; LSC,

401 Large single copy; ML, Maximum likelihood; NGS, Next-generation sequencing; RDR,  
402 Recombination-dependent replication; rRNA, Ribosomal RNA; SDRs, Short dispersed  
403 repeats; SSC, Small single copy; tRNA, Transfer RNA

#### 404 **Declarations**

#### 405 **Acknowledgments**

406 We are grateful to Shi-Liang Zhou, Ran Wei, Shan-Shan Dong, Wen-Pan Dong and Jong-  
407 Soo Kang for helpful discussion. We thank Dr. Bing Liu for providing materials, Chang-  
408 Hao Li for help with analyses, and Li Wang, Zhi-Qiang Wu, AJ Harris for helpful revision  
409 and polishing of the whole manuscript. We also thank two anonymous reviewers for  
410 the insightful comments on the manuscript.

#### 411 **Ethics approval and consent to participate**

412 Not applicable.

#### 413 **Consent for publication**

414 Not applicable.

#### 415 **Funding**

416 This study was supported by the National Natural Science Foundation of China (NSFC,  
417 No. 31670205 (XCZ) and No. 31770237 (QPX)).

#### 418 **Availability of data and materials**

419 The newly sequenced plastome sequences have been deposited in Genbank under  
420 the accession number MG272482 and MK156801.

#### 421 **Authors' contributions**

422 XCZ collected samples from the field, QPX and XCZ planned and designed the research,

423 HRZ performed experiments and analyzed data, HRZ and QPX wrote the manuscript.

424 All authors discussed the results and commented on the manuscript. All authors read

425 and approved the final manuscript.

426 **Competing interests**

427 The authors declare no competing financial interests.

428 **References**

- 429 1. Daniell H, Lin C-S, Yu M, Chang W-J. Chloroplast genomes: diversity, evolution,  
430 and applications in genetic engineering. *Genome Biol* 2016; 17(1):1-29.
- 431 2. Mower JP, Vickrey TL: Structural diversity among plastid genomes of land plants.  
432 In: *Adv Bot Res*. Edited by Chaw S-M, Jansen RK, vol. 85: Academic Press; 2018:  
433 263-292.
- 434 3. Raubeson LA, Jansen RK: Chloroplast genomes of plants. In: *Plant diversity and*  
435 *evolution: genotypic and phenotypic variation in higher plants*. CABI Publishing;  
436 2005: 45-68.
- 437 4. Wicke S, Schneeweiss GM, dePamphilis CW, Müller KF, Quandt D. The evolution  
438 of the plastid chromosome in land plants: gene content, gene order, gene  
439 function. *Plant Mol Biol* 2011; 76(3):273-297.
- 440 5. Simpson CL, Stern DB. The treasure trove of algal chloroplast genomes.  
441 Surprises in architecture and gene content, and their functional implications.  
442 *Plant Physiol* 2002; 129(3):957-966.
- 443 6. Sanderson MJ, Copetti D, Búrquez A, Bustamante E, Charboneau JL, Eguiarte  
444 LE, Kumar S, Lee HO, Lee J, McMahon M. Exceptional reduction of the plastid  
445 genome of saguaro cactus (*Carnegiea gigantea*): Loss of the *ndh* gene suite and  
446 inverted repeat. *Am J Bot* 2015; 102(7):1115-1127.
- 447 7. Blazier JC, Guisinger MM, Jansen RK. Recent loss of plastid-encoded *ndh* genes  
448 within *Erodium* (Geraniaceae). *Plant Mol Biol* 2011; 76(3-5):263-272.
- 449 8. Jansen RK, Wojciechowski MF, Sanniyasi E, Lee S-B, Daniell H. Complete plastid

- 450 genome sequence of the chickpea (*Cicer arietinum*) and the phylogenetic  
451 distribution of *rps12* and *clpP* intron losses among legumes (Leguminosae).  
452 Mol Phylogen Evol 2008; 48(3):1204-1217.
- 453 9. Wu C-S, Wang Y-N, Hsu C-Y, Lin C-P, Chaw S-M. Loss of different inverted repeat  
454 copies from the chloroplast genomes of Pinaceae and Cupressophytes and  
455 influence of heterotachy on the evaluation of gymnosperm phylogeny. Gen Biol  
456 Evol 2011; 3:1284-1295.
- 457 10. Palmer JD. Chloroplast DNA exists in two orientations. Nature 1983;  
458 301(5895):92-93.
- 459 11. Palmer JD, Thompson WF. Chloroplast DNA rearrangements are more frequent  
460 when a large inverted repeat sequence is lost. Cell 1982; 29(2):537-550.
- 461 12. Cai Z, Guisinger M, Kim H-G, Ruck E, Blazier JC, McMurtry V, Kuehl JV, Boore J,  
462 Jansen RK. Extensive reorganization of the plastid genome of *Trifolium*  
463 *subterraneum* (Fabaceae) is associated with numerous repeated sequences  
464 and novel DNA insertions. J Mol Evol 2008; 67(6):696-704.
- 465 13. Guisinger MM, Kuehl JV, Boore JL, Jansen RK. Extreme reconfiguration of  
466 plastid genomes in the angiosperm family Geraniaceae: rearrangements,  
467 repeats, and codon usage. Mol Biol Evol 2011; 28(1):583-600.
- 468 14. Chumley TW, Palmer JD, Mower JP, Fourcade HM, Calie PJ, Boore JL, Jansen RK.  
469 The complete chloroplast genome sequence of *Pelargonium× hortorum*:  
470 organization and evolution of the largest and most highly rearranged  
471 chloroplast genome of land plants. Mol Biol Evol 2006; 23(11):2175-2190.



- 472 15. Haberle RC, Fourcade HM, Boore JL, Jansen RK. Extensive rearrangements in  
473 the chloroplast genome of *Trachelium caeruleum* are associated with repeats  
474 and tRNA genes. *J Mol Evol* 2008; 66(4):350-361.
- 475 16. Blazier JC, Jansen RK, Mower JP, Govindu M, Zhang J, Weng M-L, Ruhlman TA.  
476 Variable presence of the inverted repeat and plastome stability in *Erodium*. *Ann*  
477 *Bot* 2016; 117(7):1209-1220.
- 478 17. Pombert J-F, Otis C, Lemieux C, Turmel M. The chloroplast genome sequence  
479 of the green alga *Pseudendoclonium akinetum* (Ulvophyceae) reveals unusual  
480 structural features and new insights into the branching order of chlorophyte  
481 lineages. *Mol Biol Evol* 2005; 22(9):1903-1918.
- 482 18. Pombert J-F, Lemieux C, Turmel M. The complete chloroplast DNA sequence of  
483 the green alga *Oltmannsiellopsis viridis* reveals a distinctive quadripartite  
484 architecture in the chloroplast genome of early diverging ulvophytes. *BMC Biol*  
485 2006; 4(1):3.
- 486 19. Turmel M, Lemieux C: Evolution of the plastid genome in green algae. In: *Adv*  
487 *Bot Res*. Edited by Chaw S-M, Jansen RK, vol. 85: Academic Press; 2018: 157-  
488 193.
- 489 20. Reyes-Prieto A, Russell S, Figueroa-Martinez F, Jackson C. Chapter Four -  
490 Comparative Plastid Genomics of Glaucophytes. In: *Adv Bot Res*. Edited by  
491 Chaw S-M, Jansen RK, vol. 85: Academic Press; 2018: 95-127.
- 492 21. Yu M, Ashworth MP, Hajrah NH, Khiyami MA, Sabir MJ, Alhebshi AM, Al-Malki  
493 AL, Sabir JS, Theriot EC, Jansen RK: Evolution of the plastid genomes in Diatoms.

- 494 In: *Adv Bot Res*. Edited by Chaw S-M, Jansen RK, vol. 85: Academic Press; 2018:  
495 129-155.
- 496 22. Zhang Z, Green BR, Cavalier-Smith T. Single gene circles in dinoflagellate  
497 chloroplast genomes. *Nature* 1999; 400:155.
- 498 23. Del Cortona A, Leliaert F, Bogaert KA, Turmel M, Boedeker C, Janouškovec J,  
499 Lopez-Bautista JM, Verbruggen H, Vandepoele K, De Clerck O. The plastid  
500 genome in Cladophorales green algae is encoded by hairpin chromosomes.  
501 *Curr Biol* 2017; 27(24):3771-3782.e3776.
- 502 24. Reith M. Molecular biology of rhodophyte and chromophyte plastids. *Annu Rev*  
503 *Plant Biol* 1995; 46(1):549-575.
- 504 25. Hallick RB, Hong L, Drager RG, Favreau MR, Monfort A, Orsat B, Spielmann A,  
505 Stutz E. Complete sequence of *Euglena gracilis* chloroplast DNA. *Nucleic Acids*  
506 *Res* 1993; 21(15):3537-3544.
- 507 26. Reith M, Munholland J. The ribosomal RNA repeats are non-identical and  
508 directly oriented in the chloroplast genome of the red alga *Porphyra purpurea*.  
509 *Curr Genet* 1993; 24(5):443-450.
- 510 27. Xu Z, Xin T, Bartels D, Li Y, Gu W, Yao H, Liu S, Yu H, Pu X, Zhou J *et al*. Genome  
511 analysis of the ancient tracheophyte *Selaginella tamariscina* reveals  
512 evolutionary features relevant to the acquisition of desiccation tolerance.  
513 *Molecular Plant* 2018; 11:983-994.
- 514 28. Banks JA. *Selaginella* and 400 million years of separation. *Annu Rev Plant Biol*  
515 2009; 60:223-238.

- 516 29. Wick RR, Schultz MB, Zobel J, Holt KE. Bandage: interactive visualization of de  
517 novo genome assemblies. *Bioinformatics* 2015; 31(20):3350-3352.
- 518 30. Tsuji S, Ueda K, Nishiyama T, Hasebe M, Yoshikawa S, Konagaya A, Nishiuchi T,  
519 Yamaguchi K. The chloroplast genome from a lycophyte (microphylophyte),  
520 *Selaginella uncinata*, has a unique inversion, transpositions and many gene  
521 losses. *J Plant Res* 2007; 120(2):281-290.
- 522 31. Smith DR. Unparalleled GC content in the plastid DNA of *Selaginella*. *Plant Mol*  
523 *Biol* 2009; 71(6):627-639.
- 524 32. Klaus KV, Schulz C, Bauer DS, Stützel T. Historical biogeography of the ancient  
525 lycophyte genus *Selaginella*: early adaptation to xeric habitats on Pangea.  
526 *Cladistics* 2017; 33(5):469-480.
- 527 33. Grewe F, Guo W, Gubbels EA, Hansen AK, Mower JP. Complete plastid genomes  
528 from *Ophioglossum californicum*, *Psilotum nudum*, and *Equisetum hyemale*  
529 reveal an ancestral land plant genome structure and resolve the position of  
530 Equisetales among monilophytes. *BMC Evol Biol* 2013; 13(1):1-16.
- 531 34. Guo Z-Y, Zhang H-R, Shrestha N, Zhang X-C. Complete chloroplast genome of a  
532 valuable medicinal plant, *Huperzia serrata* (Lycopodiaceae), and comparison  
533 with its congener. *Appl Plant Sci* 2016; 4(11):1600071.
- 534 35. Zhang H-R, Kang J-S, Viane RL, Zhang X-C. The complete chloroplast genome  
535 sequence of *Huperzia javanica* (sw.) CY Yang in Lycopodiaceae. *Mitochondrial*  
536 *DNA Part B* 2017; 2(1):216-218.
- 537 36. Wolf PG, Karol KG, Mandoli DF, Kuehl J, Arumuganathan K, Ellis MW, Mishler

- 538 BD, Kelch DG, Olmstead RG, Boore JL. The first complete chloroplast genome  
539 sequence of a lycophyte, *Huperzia lucidula* (Lycopodiaceae). *Gene* 2005;  
540 350(2):117-128.
- 541 37. Karol KG, Arumuganathan K, Boore JL, Duffy AM, Everett KD, Hall JD, Hansen  
542 SK, Kuehl JV, Mandoli DF, Mishler BD *et al.* Complete plastome sequences of  
543 *Equisetum arvense* and *Isoetes flaccida*: implications for phylogeny and plastid  
544 genome evolution of early land plant lineages. *BMC Evol Biol* 2010; 10(1):1-16.
- 545 38. Arrigo N, Therrien J, Anderson CL, Windham MD, Haufler CH, Barker MS. A total  
546 evidence approach to understanding phylogenetic relationships and ecological  
547 diversity in *Selaginella* subg. *Tetragonostachys*. *Am J Bot* 2013; 100(8):1672-  
548 1682.
- 549 39. McElwain JC, Punyasena SW. Mass extinction events and the plant fossil record.  
550 *Trends Ecol Evol* 2007; 22(10):548-557.
- 551 40. Oldenburg DJ, Bendich AJ. Most chloroplast DNA of maize seedlings in linear  
552 molecules with defined ends and branched forms. *J Mol Biol* 2004; 335(4):953-  
553 970.
- 554 41. Bachvaroff TR, Concepcion GT, Rogers CR, Herman EM, Delwiche CF.  
555 Dinoflagellate expressed sequence tag data indicate massive transfer of  
556 chloroplast genes to the nuclear genome. *Protist* 2004; 155(1):65-78.
- 557 42. Kolodner R, Tewari K. Inverted repeats in chloroplast DNA from higher plants.  
558 *Proc Natl Acad Sci* 1979; 76(1):41-45.
- 559 43. Maréchal A, Brisson N. Recombination and the maintenance of plant organelle

- 560 genome stability. *New Phytol* 2010; 186(2):299-317.
- 561 44. Ruhlman TA, Zhang J, Blazier JC, Sabir JS, Jansen RK. Recombination-dependent  
562 replication and gene conversion homogenize repeat sequences and diversify  
563 plastid genome structure. *Am J Bot* 2017; 104(4):559-572.
- 564 45. Smith DR, Keeling PJ. Mitochondrial and plastid genome architecture:  
565 reoccurring themes, but significant differences at the extremes. *Proc Natl Acad  
566 Sci* 2015; 112(33):10177-10184.
- 567 46. Guo W, Grewe F, Fan W, Young GJ, Knoop V, Palmer JD, Mower JP. *Ginkgo* and  
568 *Welwitschia* mitogenomes reveal extreme contrasts in gymnosperm  
569 mitochondrial evolution. *Mol Biol Evol* 2016; 33(6):1448-1460.
- 570 47. Fauron C, Casper M, Gao Y, Moore B. The maize mitochondrial genome:  
571 dynamic, yet functional. *Trends Genet* 1995; 11(6):228-235.
- 572 48. Li J, Wang S, Yu J, Wang L, Zhou S. A modified CTAB protocol for plant DNA  
573 extraction. *Bulletin of Botany* 2013; 48(1):72-78.
- 574 49. Bankevich A, Nurk S, Antipov D, Gurevich AA, Dvorkin M, Kulikov AS, Lesin VM,  
575 Nikolenko SI, Pham S, Prjibelski AD. SPAdes: a new genome assembly algorithm  
576 and its applications to single-cell sequencing. *J Comput Biol* 2012; 19(5):455-  
577 477.
- 578 50. Camacho C, Coulouris G, Avagyan V, Ma N, Papadopoulos J, Bealer K, Madden  
579 TL. BLAST+: architecture and applications. *BMC Bioinformatics* 2009; 10(1):421.
- 580 51. Altschul SF, Gish W, Miller W, Myers EW, Lipman DJ. Basic local alignment search  
581 tool. *J Mol Biol* 1990; 215(3):403-410.

- 582 52. Lowe TM, Eddy SR. tRNAscan-SE: a program for improved detection of transfer  
583 RNA genes in genomic sequence. *Nucleic Acids Res* 1997; 25(5):955-964.
- 584 53. Laslett D, Canback B. ARAGORN, a program to detect tRNA genes and tmRNA  
585 genes in nucleotide sequences. *Nucleic Acids Res* 2004; 32(1):11-16.
- 586 54. Lohse M, Drechsel O, Bock R. OrganellarGenomeDRAW (OGDRAW): a tool for  
587 the easy generation of high-quality custom graphical maps of plastid and  
588 mitochondrial genomes. *Curr Genet* 2007; 52(5-6):267-274.
- 589 55. Untergasser A, Cutcutache I, Koressaar T, Ye J, Faircloth BC, Remm M, Rozen SG.  
590 Primer3—new capabilities and interfaces. *Nucleic Acids Res* 2012; 40(15):e115.
- 591 56. Krumsiek J, Arnold R, Rattei T. Gepard: a rapid and sensitive tool for creating  
592 dotplots on genome scale. *Bioinformatics* 2007; 23(8):1026-1028.
- 593 57. Volfovsky N, Haas BJ, Salzberg SL. A clustering method for repeat analysis in  
594 DNA sequences. *Genome Biol* 2001; 2(8):1-11.
- 595 58. Gu Z, Gu L, Eils R, Schlesner M, Brors B. circlize implements and enhances  
596 circular visualization in R. *Bioinformatics* 2014; 30(19):2811-2812.
- 597 59. Katoh K, Standley DM. MAFFT multiple sequence alignment software version 7:  
598 improvements in performance and usability. *Mol Biol Evol* 2013; 30(4):772-780.
- 599 60. Stamatakis A. RAxML-VI-HPC: maximum likelihood-based phylogenetic  
600 analyses with thousands of taxa and mixed models. *Bioinformatics* 2006;  
601 22(21):2688-2690.
- 602 61. Darriba D, Taboada GL, Doallo R, Posada D. jModelTest 2: more models, new  
603 heuristics and parallel computing. *Nat Methods* 2012; 9(8):772.

- 604 62. Suchard MA, Lemey P, Baele G, Ayres DL, Drummond AJ, Rambaut A. Bayesian  
605 phylogenetic and phylodynamic data integration using BEAST 1.10. *Virus*  
606 *Evolution* 2018; 4(1):vey016.
- 607 63. Morris JL, Puttick MN, Clark JW, Edwards D, Kenrick P, Pressel S, Wellman CH,  
608 Yang Z, Schneider H, Donoghue PCJ. The timescale of early land plant evolution.  
609 *Proc Natl Acad Sci* 2018; 115(10):E2274.
- 610 64. Rambaut A, Drummond A. Tracer: MCMC trace analysis tool, version 1.5.  
611 University of Oxford: Oxford 2009.
- 612 65. Rambaut A: FigTree-version 1.4. 3, a graphical viewer of phylogenetic trees. In.;  
613 2017.
- 614
- 615

616 **Figure legends**

617 **Fig. 1. Unit-genome map of *S. vardei* shown as circular.** The middle ring shows the  
618 mapping results of PCR data with assembled sequence. The arrows point to the  
619 endpoints of the ca. 50-kb fragment (from *trnN* to *trnF*) inversion. The black triangular  
620 and numbers showed the position of primers for confirming the boundaries of DR  
621 regions and the 50-kb inversion.

622 **Fig. 2. Linear maps of plastomes between *S. vardei* and other lycophytes showing**  
623 **the inversions.** Upper arrow indicates genes in forward direction; lower arrow  
624 indicates genes in reverse direction.

625 **Fig. 3. Repeats of *S. vardei* and other species in Lycophytes.** The gap of each circle  
626 represents the start position and the direction is clockwise.

627 **Fig. 4. Phylogenetic reconstruction, time estimation of *S. vardei* and simplified**  
628 **structure of plastomes of each species. Node A-C represent the calibration nodes.**  
629 Node A: a secondary calibration of the root age corresponded to the split of  
630 Bryophytes and vascular plants (470-583 Ma); node B: a fossil node separating ferns  
631 and seed plants (385-451 Ma); node C: a fossil node separating Selaginellaceae and  
632 its sister family Isoetaceae (372-392 Ma). **a, b, c** represents the plastomes with DR  
633 structure.

634



635 Table 1 Representatives related for confirmation of plastome structure of *S. vardei*

| <b>Species</b>   | <b>Voucher</b>              | <b>Locality</b>         |
|------------------|-----------------------------|-------------------------|
| <i>S. vardei</i> | Zhang X. C. et al. 836 (PE) | Tibet, China            |
| <i>S. indica</i> | Zhang X. C. 5868 (PE)       | Sichuan Province, China |
| <i>S. indica</i> | Zhang X. C. 6255 (PE)       | Yunnan Province, China  |
| <i>S. dregei</i> | Liu B. 26698 (PE)           | Kenya                   |

636

637 **Additional materials**

638 **Additional file 1: Fig. S1. Confirmation of *S. vardei* plastome structure. a:** PCR amplification  
639 results of *S. vardei*. Primer pairs used are indicated at the top of each lane. Size markers are in  
640 bp. Gene names of these 11 products are as follows: 1: *rpoB* – *rps2*; 2: *rps2* – *chlB*; 3: *chlB* –  
641 *ycf2*; 4: *ycf2* – *psaB*; 5: *psaB* – *rrn23*; 6: *rrn23-rpl2*; 7: *rpl2* – *petB*; 8: *petB* – *petE*; 9: *petE* – *atpB*;  
642 10: *atpB* – *ycf1*; 11: *ycf1-rrn23*; 12: *rrn23-rpoB*. **b:** PCR confirmation results of DR structure and  
643 Inversion. Primer pairs used are indicated at the top of each lane. Size markers are in bp. Gene  
644 names of these 12 fragments are as follows: 1-2: *rps4* – *rrn5*; 1-3: *rps4* – *petN*; 3-4: *petN* – *rpl2*;  
645 2-4: *rrn5* – *rpl2*; 1-2: *rps4* – *rrn5*; 1-5: *rps4* – *atpE*; 5-6: *atpE* – *chlL*; 2-6: *rrn5* – *chlL*; 7-8: *ccsA* –  
646 *rrn5*; 7-9: *ccsA* – *petN*; 9-10: *petN* – *rpoB*; 8-10: *rrn5* – *rpoB*; **c:** Reads coverage of *S. vardei*  
647 plastomes; **d:** The assembled graph in bandage showing DR structure.

648 **Additional file 2: Fig. S2. Plastome structure confirmation and sequence alignments of**  
649 **related representatives. a:** PCR confirmation results of DR structure in another individual of *S.*  
650 *vardei* and two representative species within subg. *Rupestrae*. Primer pairs used are indicated  
651 at the top of each lane. Size markers are in bp. Gene names of these fragments are as follows:  
652 1-2: *rps4* – *rrn5*; 3-4: *petN* – *rpl2*; 5-6: *atpE* – *chlL*; 7-8: *ccsA* – *rrn5*; 9-10: *petN* – *rpoB*; **b:**  
653 Alignment results of sequences from each product in **a**, the light grey color represents regions  
654 with identical base pairs among individuals, whereas the dark color highlights regions with  
655 inconsistent base pairs.

656 **Additional file 3: Fig. S3. Dot-plot analyses of plastomes between *S. vardei* and other**  
657 **lycophyte species.**

658 **Additional file 4: Fig. S4. Reads coverages of putative subgenomes and alternative reads**  
659 **assemblies in *S. vardei*. a, b:** Two alternative reads assemblies at LSC/DRa and SSC/DRb  
660 boundaries: the unmatched reads in black box in **a** is consistent with assembled sequence in  
661 black box in **b**, the unmatched reads in red box in **b** is consistent with assembled sequence in  
662 red box in **a**; **c, d:** Two alternative reads assemblies at DRa/SSC and DRb/LSC boundaries: the  
663 unmatched reads in black box in **c** is consistent with assembled sequence in black box in **d**,  
664 the unmatched reads in red box in **d** is consistent with assembled sequence in red box in **c**. **e:**  
665 the simplified structure for master chromosomes and subgenomes based on **a, b, c, d** in this  
666 figure. We define the arrow end as B, and the other end as A. End B of either LSC (**a**) or SSC  
667 (**b**) can be assembled with end B of DR. End A of either LSC (**c**) or SSC (**d**) can be assembled  
668 with end A of DR.

669 **Additional file 5: Fig. S5. Screened PacBio reads of *S. tamariscina* showing evidence of the**  
670 **existence of subgenomes in plastomes with DR. a:** the simplified plastome structure of *S.*  
671 *tamariscina* based on Xu et al. (2018); **b, c:** the simplified subgenome structure of plastomes  
672 with DR, supported by the screened PacBio reads of *S. tamariscina* plastome as listed.

673 **Additional file 6:** Table S1. Genes present in the plastome of *S. vardei*.

674 **Additional file 7:** Table S2. Primers designed for long range PCR amplification of plastome of  
675 *S. vardei*.

676 **Additional file 8:** Table S3. Internal primers designed for Sanger sequencing of PCR products  
677 of *S. vardei*.

678 **Additional file 9:** Table S4. Primers designed for Sanger sequencing of PCR confirmation of  
679 *Selaginella* subg. *Rupestrae*.

680 **Additional file 10:** Table S5. Detailed dispersed short repeats in plastid genome of each  
681 species.

682 **Additional file 11:** Table S6. Species selected in the phylogenetic analyses.

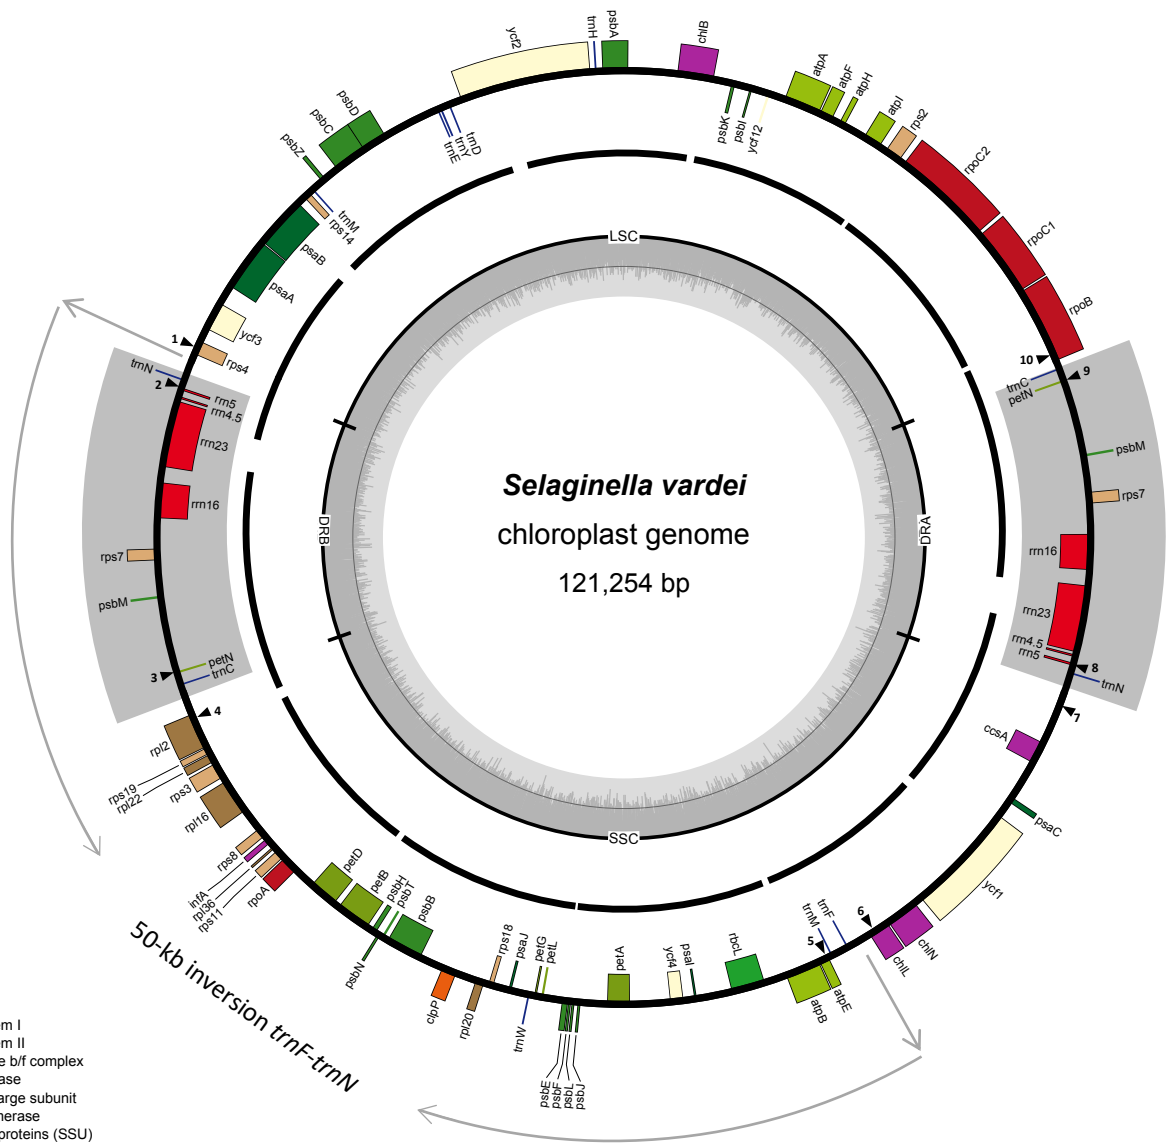

- photosystem I
- photosystem II
- cytochrome b/f complex
- ATP synthase
- RubisCO large subunit
- RNA polymerase
- ribosomal proteins (SSU)
- ribosomal proteins (LSU)
- *clpP*, *matK*
- other genes
- hypothetical chloroplast reading frames (*ycf*)
- transfer RNAs
- ribosomal RNAs

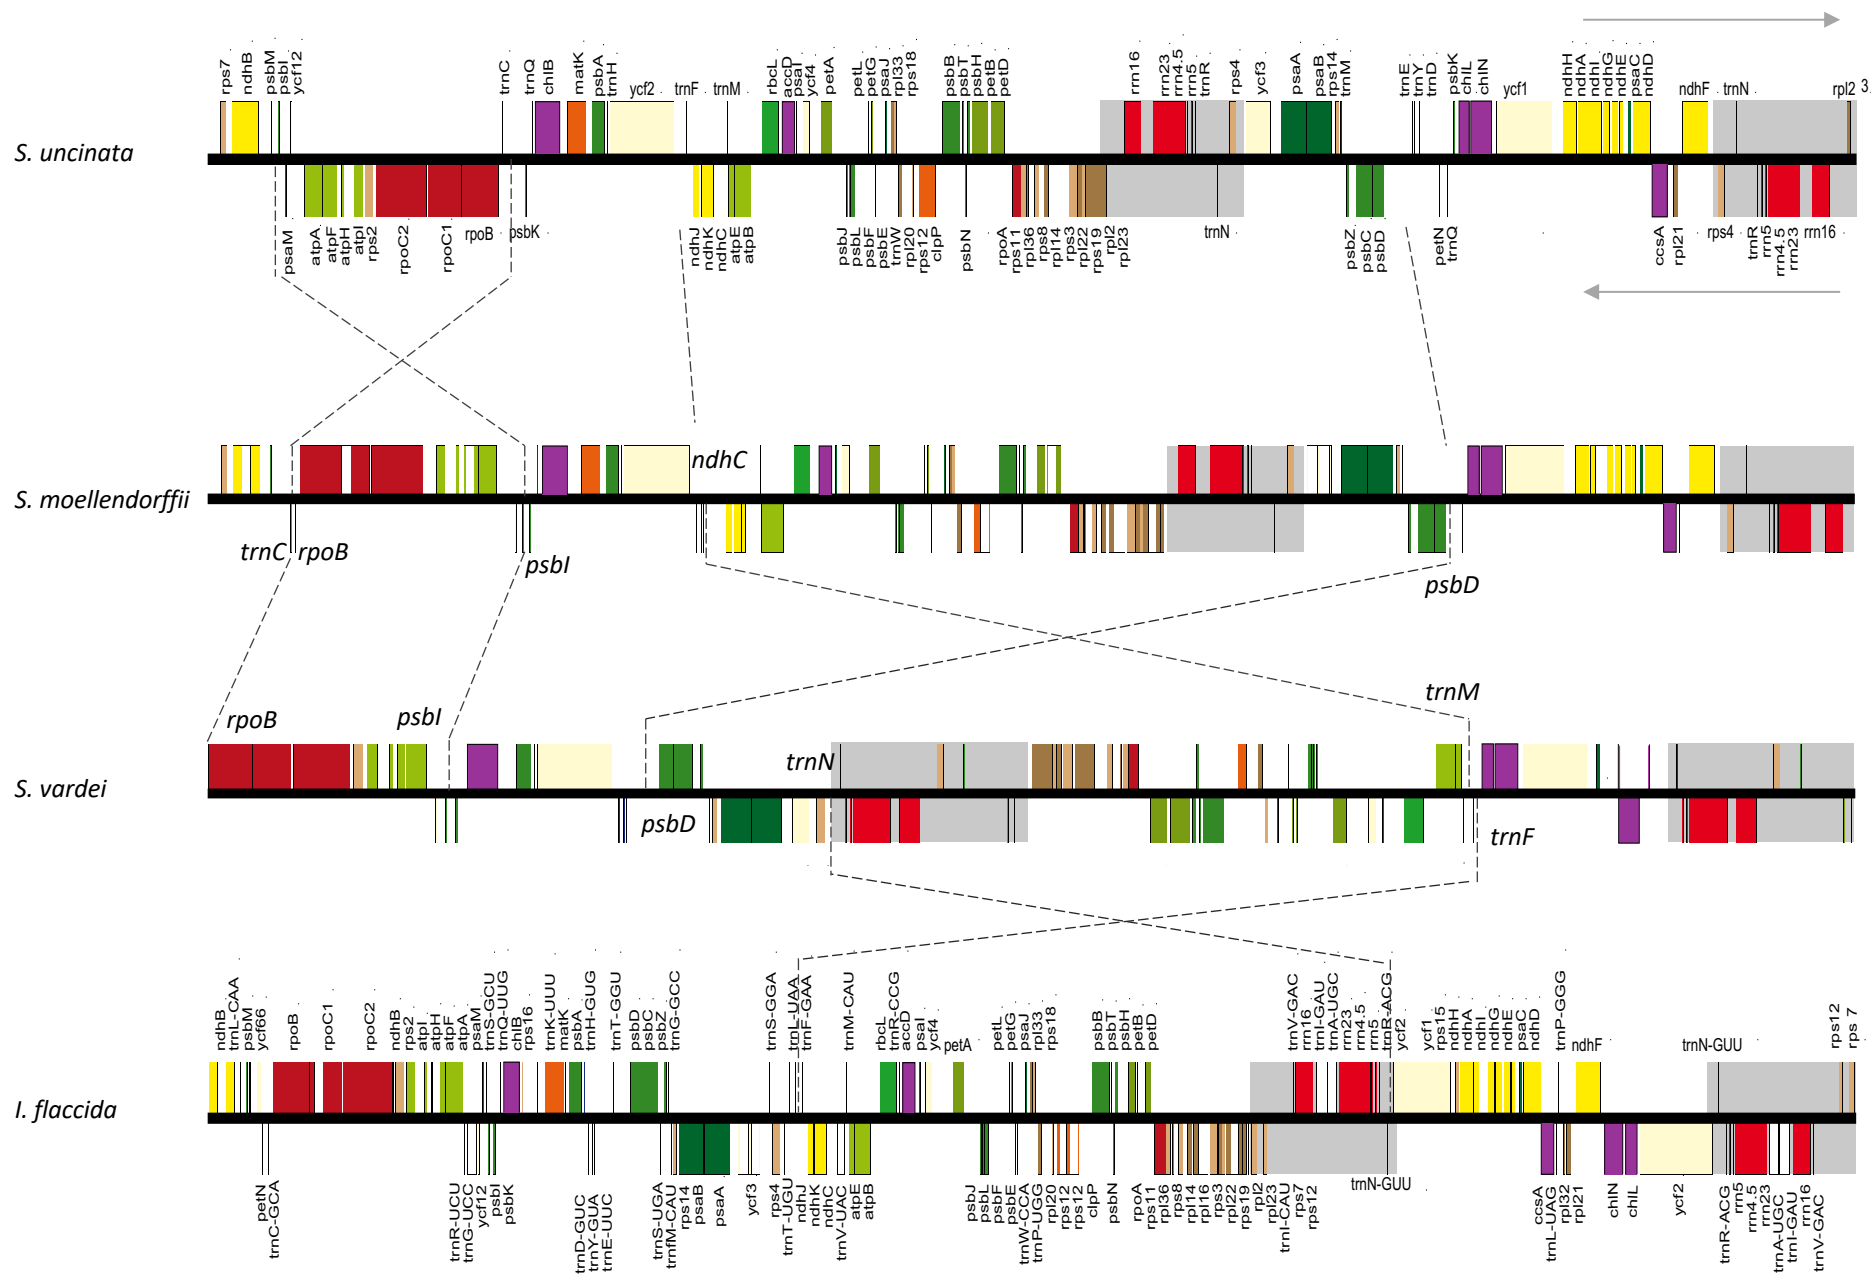

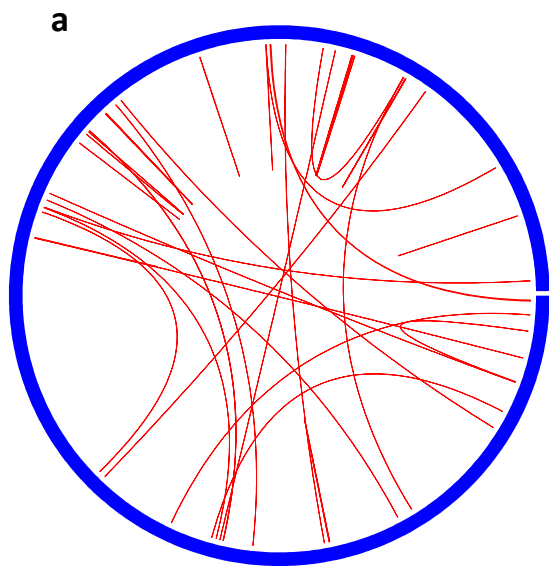

*Huperzia serrata*

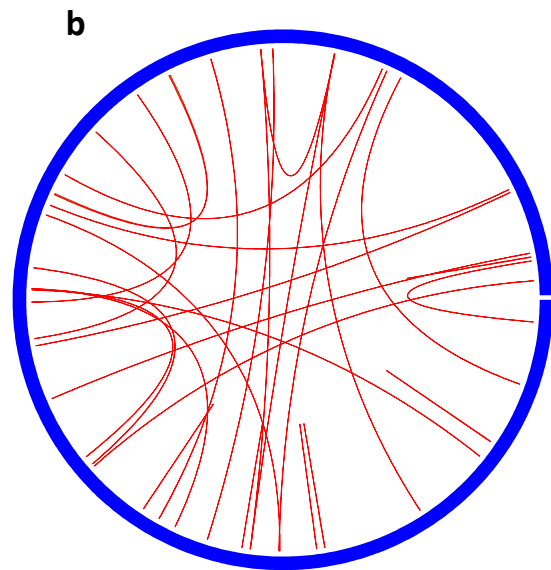

*Isoetes flaccida*

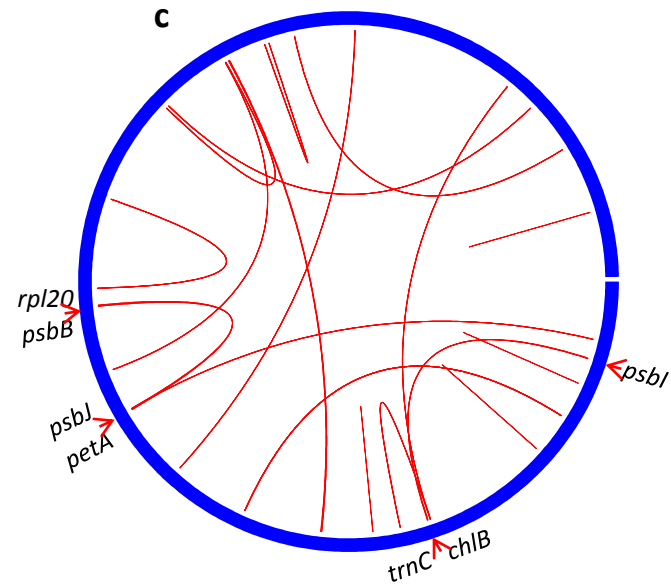

*Selaginella uncinata*

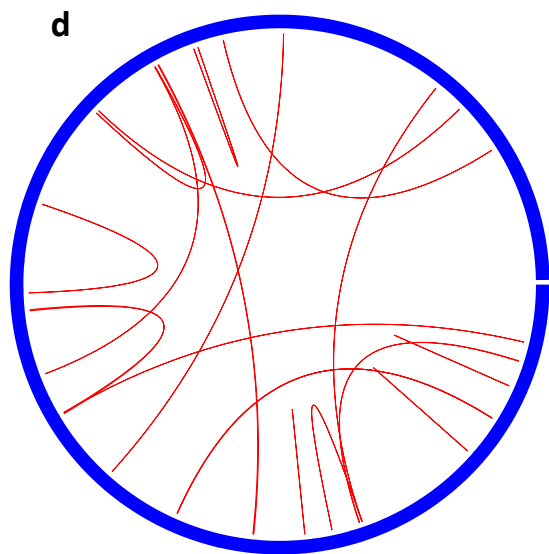

*S. moellendorffii*

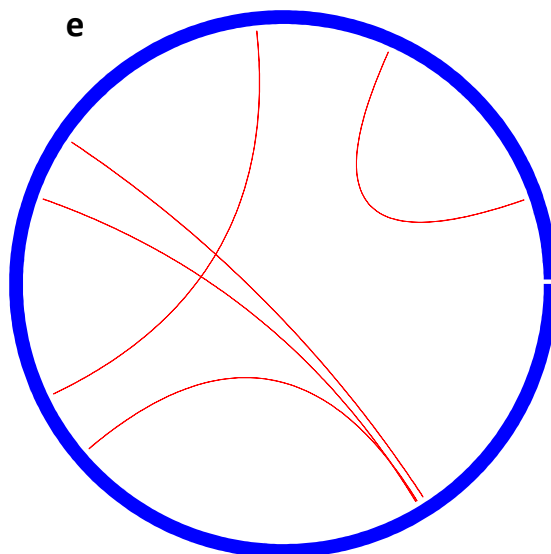

*S. indica*

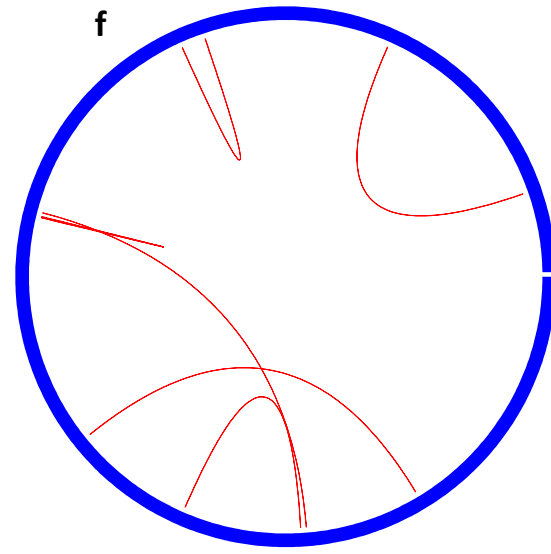

*S. vardei*

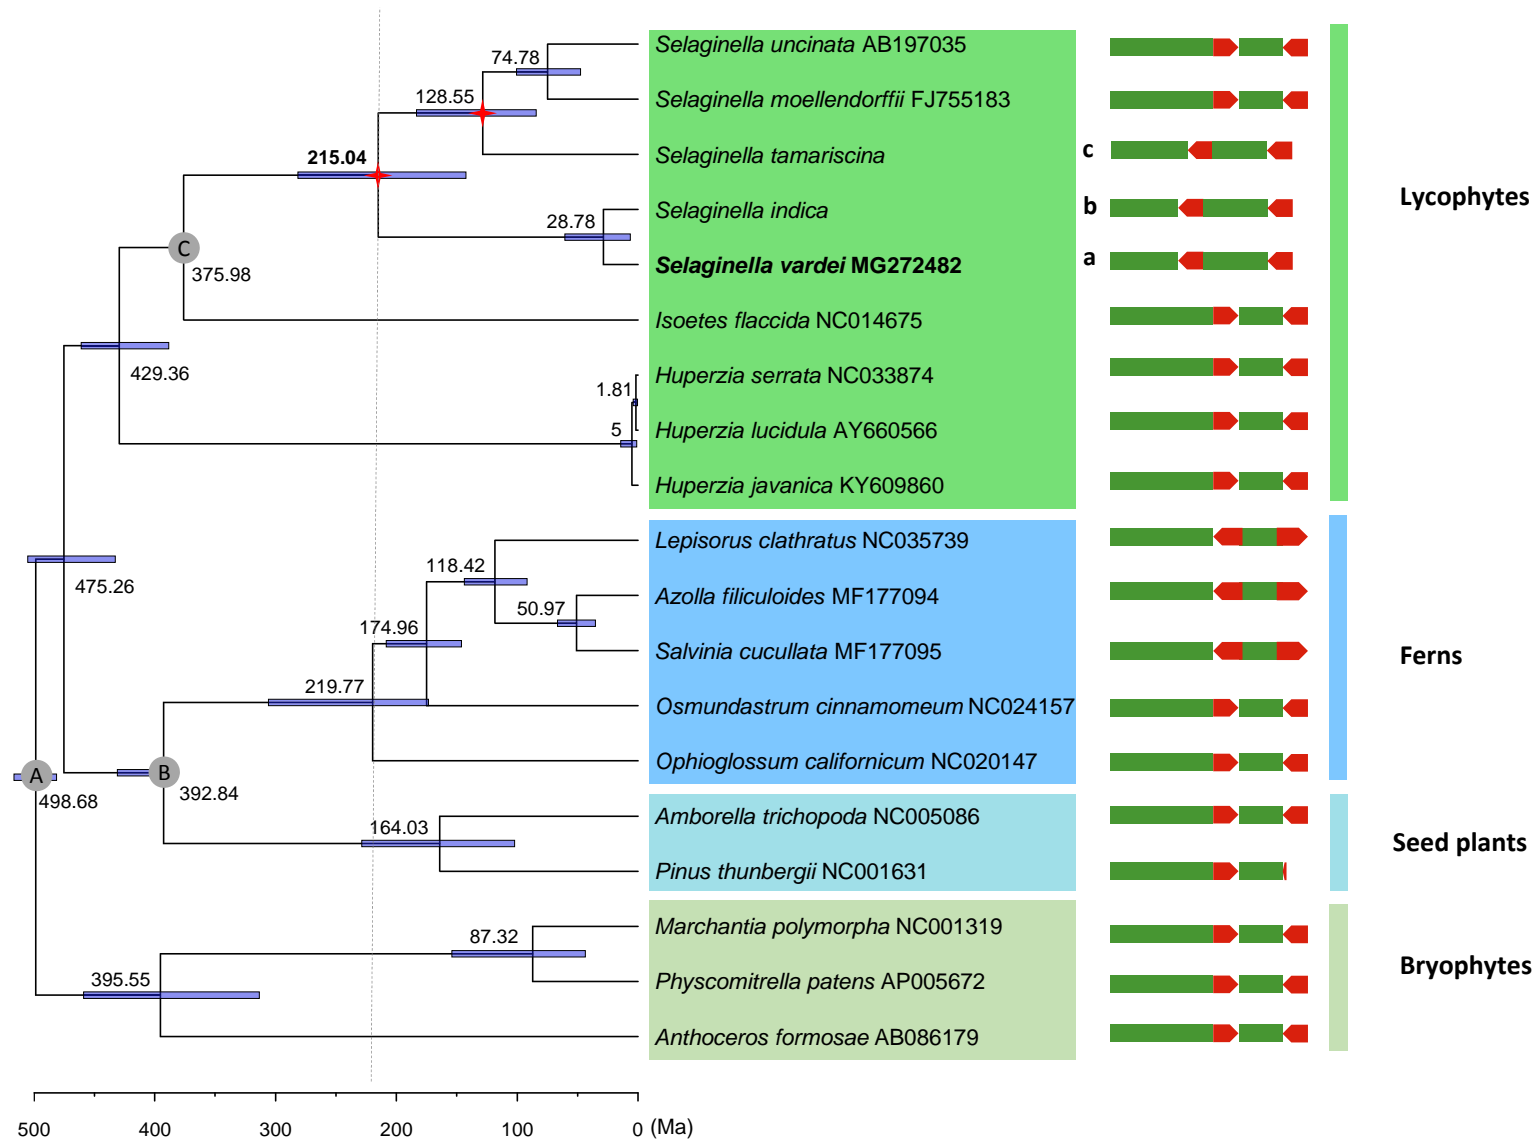

Source: https://www.biorxiv.org/content/10.1101/505842v1.full.pdf
